# Supplementary material
Source: publisher site journal article supplement (https://www.dovepress.com/article/408976)
Supplement: Supplementary file 1 [file get_supplementary_file.php]

**METHODS**

**Culture and purity checks**

Mycobacterial growth supplement containing reconstituted PANTA (Becton Dickinson (BD)) in OADC enrichment (15.0 mL) was added (0.8 mL) to MGIT tubes (BD) containing Middlebrook 7H9 broth. A volume of 0.1 mL of vortexed isolate was added to MGIT tubes and incubated in the BACTEC™ MGIT 960™ instrument (New Jersey, USA). A susceptible strain of *Mtb* (H37Rv, ATCC 27294) was used as the positive control. After 6-7 days, the tubes flagged positive and underwent three purity control checks for contamination: (1) MGIT TBc identification test (BD, 245159) for *Mtb* complex, (2) Trypticase II soy agar non-selective plates enriched with 5% sheep blood and (3) Modified Ziehl-Neelsen stain for roping *Mtb* bacilli.

**Loading MGIT tubes and MIC interpretation**

Inoculated MGIT tubes were registered on the MGIT EpiCenter software (version V7.45A) using the TB eXiST module and loaded into the MGIT instrument in order of GC, lowest concentration to highest concentration for each drug and for each isolate. Reports were filtered by a minimum of four days and maximum of 24 days. At the point when the GC reached 400 growth units (GU), the respective drug tubes were interpreted as either susceptible at 0-99 GU or resistant at ≥100 GU for all drug concentrations. The lowest/first concentration susceptible to the drug was recorded as the minimum inhibitory concentration (MIC) value. If the MIC was found below the critical concentration (CC) of the drug, the isolate was interpreted as susceptible, and if the MIC was found above the CC of a drug, it was interpreted as resistant to the drug.

**DNA extraction, quantification and PCR confirmation**

Middlebrook 7H11 agar plates (MediaMage, M50144) were streaked with the MGIT suspension and placed in a 5% CO2 incubator for three weeks. Colonies were scraped into 1.0 mL tris-ethylenediaminetetraacetic acid (TE) buffer (Sigma-Aldrich) along with H37Rv as the positive control. Bacteria were inactivated in a heat block (95°C, 30 mins), tubes were centrifuged (13000 rpm, 5 mins) and supernatant removed. DNA was extracted using the CTAB (cetrimide/hexadecyl trimethyl-ammonium bromide) method following a combination of previously published protocols.1,2 75µL of 10% SDS solution (Sigma-Aldrich) and 75μl of proteinase K (Sigma-Aldrich) at 10mg/ml concentration were added. Tubes were vortexed at maximum speed and incubated in a heat block (65°C, 10 mins). From a 5M NaCl solution (Sigma-Aldrich), 100µL was added and tubes were vortexed. CTAB-NaCl solution (cetrimide/hexadecyl trimethyl-ammonium bromide/CTAB) (Sigma-Aldrich) was made and pre-warmed (65°C) and 100μl was added. Tubes were vortexed and incubated (65˚C, 10 mins). Thereafter, 750μl of a chloroform: isoamyl alcohol (24:1) mixture (Sigma-Aldrich) was added, tubes were agitated for 10 seconds or till contents turned milky, and centrifuged (12000rpm, 20 mins). The aqueous supernatant was transferred to a sterile tube with 500μl of isopropanol (Sigma-Aldrich). Tubes were gently inverted three times and contents were observed for a thin thread before centrifuging (30 mins, 12000rpm) and discarding the isopropanol supernatant. The pellet was washed in 1ml of 70% cold ethanol by inverting the tubes and centrifuging (5 mins, 12 000rpm). The ethanol supernatant was discarded, and the pellet was washed again with 500μl of 70% ethanol. After centrifugation and removal of ethanol as above, the pellet was air-dried by evaporation for 30 minutes at room temperature. DNA was eluted in 20 μL of TE buffer, quantified on the Qubit® 3.0 fluorometer (Life Technologies, USA) using the Qubit® dsDNA HS assay kit (Thermo Fisher) and stored at -20˚C. DNA quality was assessed using a PCR assay (Expand Hi Fidelity PCR system DNTPack 100U (Roche Diagnostics, Germany, 11732641001)) and primers (Sigma-Aldrich) of the *IS6110* and *1400 rrs* regions of the *Mtb* genome. Amplified products were run on a 1% agarose gel to verify the presence of the *IS6110* (exclusive to *Mtb*) and *1400 rrs* (16s rRNA housekeeping gene) regions.

**CLINICAL COURSE AND TREATMENT HISTORY**

**Patient 1**

History: Patient 1 was diagnosed with MDR-TB and had bilateral apical infiltrates and cavitation on a baseline chest radiograph. He was previously treated for DS-TB with first line drugs for approximately eight months.

MDR-TB treatment and microbiologic response: He was initiated on the standard long regimen consisting of isoniazid (INH), pyrazinamide (PZA), moxifloxacin (MOXI), kanamycin (KANA), ethionamide (ETH), and terizidone (TERI). However, MTBDR*plus* demonstrated resistance to rifampicin (RIF) (*rpoB* S450L) and INH (*katG* S315T). INH was stopped due to suspected high-level resistance (*katG)*. The patient remained culture negative for 6 months before reverting to culture positive in month 7, at which time treatment failure was determined. At this point KANA and MOXI were stopped, and BDQ, LEVO, LZD, and PAS were added. The new regimen was therefore constituted by BDQ, LEVO, LZD, PAS, TERI, ETH, and PZA. The patient culture converted after one month on the new regimen and remained culture negative until completion of the BDQ regimen. After three consecutive negative smears and cultures. and no sign of active disease on the chest X-ray, the patient was deemed to have been cured.

**Patient 2**

History: Patient 2 was diagnosed with RIF mono-resistant TB, with no previous episodes of TB. Her baseline chest radiograph showed bilateral apical infiltrates and no cavitation.

MDR-TB treatment and microbiologic response: She was initiated on the standard short regimen consisting of INH, PZA, EMB, MOXI, KAN, ETH, and CFZ. MTBDR*plus* demonstrated resistance to RIF only (*rpoB* H445N). After enrolment, KANA and MOXI were stopped and BDQ and LEVO were initiated as per the short BDQ regimen along with INH, PZA, EMB, ETH and CFZ. However, after persistent culture and smear positivity between months 0 and 5, treatment failure was determined. BDQ was therefore extended and LZD, TERI and PAS were added. As phenotypic drug susceptibility testing revealed susceptibility to rifabutin, it was added to the regimen. The patient was admitted for inpatient DOTS (Directly Observed Therapy-short course), achieved culture conversion after 2 months on the revised regimen, and thereafter remained smear and culture negative. After completing treatment with a BDQ-based regimen for 18 months, and with radiological evidence of improvement, a successful treatment outcome (cure) was determined.

**Patient 3**

History: Patient 3 was diagnosed with MDR-TB and had bilateral upper lobe infiltrates with no cavities on a baseline chest radiograph. He was previously treatment for DS-TB with six months of first line drugs.

MDR-TB treatment and microbiologic response: He was initiated on the standard short regimen consisting of INH, PZA, ETH, KANA, MOXI, CFZ, and TERI (as a replacement for EMB which was unavailable). MTBDR*plus* demonstrated resistance to RIF (*rpoB* S450L) and INH (*katG* S315T) and no mutations on MTBDR*sl*. He was placed thereafter placed on the short BDQ regimen where INH, KANA, MOXI were stopped, and BDQ and LEVO were added. After 10 months of intermittent smear and culture positivity and progressive bilateral cavities and infiltrates, treatment failure was determined. He was admitted for inpatients care and the same BDQ-based regimen was extended with the addition of LZD, DLM, PAS and Imipenem (IMI) (for two weeks). After completing 18 months of treatment with this regimen, and with sustained smear and culture negativity, a successful treatment outcome (cure) was determined.

**Patient 4**

History: Patient 4 was diagnosed with MDR-TB patient and had extensive bilateral upper lobe infiltrates and cavities on a baseline chest radiograph. He was previously treated for DS-TB with six months of first-line drugs.

MDR-TB treatment and microbiologic response: He was first initiated on the standard short regimen consisting of INH, PZA, EMB, MOXI, KAN, ETH, CFZ and Cycloserine (CS). MTBDR*plus* demonstrated resistance to RIF (*rpoB* S450L) and INH low-level resistance with ETH cross-resistance (*inhA* c-15t). After enrolment, ETH and EMB were stopped due to resistance from high confidence mutations on *inhA* (c-15t) and *embB* (Q497R) respectively. Other mutations detected were on *rpoB* (S450L), *rpsL* (K88R), *pncA* (A102V), *gyrA* (L105R) but the latter two were low confidence, therefore PZA and FQs were continued in the regimen (Individualised approach). To support an individualised regimen, BDQ, TZD, and rifabutin were added. However, he remained culture positive at month 12 and treatment failure was determined. He was admitted for inpatient DOTS with no changes to the drug regimen. Extended drug-susceptibility testing done at that time revealed additional resistance to clofazimine and bedaquiline resulting in both drugs being stopped. Imipenem and delamanid were added to the regimen. After 6 months of consistent smear and culture negativity, and radiological improvement, a successful treatment outcome (cure) was determined.

**Patient 5**

History: Patient 5 was initially diagnosed with MDR-TB and had bilateral upper lobe infiltrates with no cavitation on a baseline chest radiograph. He gave no history of prior tuberculosis.

MDR-TB treatment and microbiologic response: The patient was initiated on the standard short regimen consisting of INH, PZA, EMB, ETH, KANA, LEVO, and CFZ. MTBDR*plus* demonstrated resistance to RIF (*rpoB* H445D) and INH (*katG* S315T) and no MTBDR*sl* mutations at baseline. After enrolment, the patient was initiated on the BDQ regimen (BDQ, LEVO, CFZ, ETH, PZA, EMB) where INH was stopped due to high-level resistance. Five months post-treatment, the patient experienced culture reversion and FQ resistance was detected on a second MTBDR*sl*. Therefore, the patient was diagnosed as pre-XDR-TB and the BDQ regimen was extended along with LZD, TERI and PAS, while LEVO was excluded due to a *gyrA* mutation. After sustained smear and culture negativity and completion of BDQ-based therapy, the patient was deemed cured at study end.

**Supplementary figure 1.** Illustrates clinical course of emerging resistance in patient 3: The timeline (months) depicts treatment history, culture, smear grade status and chest x-ray results. Arrows indicate important events during treatment including the emerging minor variant on *gyrA* at month 8. MGIT culture-based 2nd line phenotypic DST results are shown for tested drugs as R (resistant) or S (susceptible). Shaded blocks indicate poor adherence to treatment. Bolded months indicate the sequenced isolates and bolded mutations indicate identified mutations in this study. AMI: Amikacin. BDQ: Bedaquiline. CAP: Capreomycin. CFZ: Clofazimine. DLM: Delamanid. ETH: Ethionamide. EMB: Ethambutol. IMI: Imipenem. INH H: Isoniazid high dose. KANA: Kanamycin. LEVO: Levofloxacin. LZD: Linezolid. Mg: milligrams. MOXI LOW: Moxifloxacin low dose. PAS: *p*-aminosalicylic acid. Pre-XDR-TB: Pre-extensively drug-resistant tuberculosis. PZA: Pyrazinamide. R: Resistant. RIF: Rifampicin. S: Susceptible. SSR: Standard Short regimen. TERI: Terizidone.

**Supplementary figure 2.** Illustrates clinical course of emerging resistance in patient 5: The timeline (months) depicts treatment history, culture, smear grade status and chest x-ray results. Arrows indicate important events during treatment including the emerging fixed mutation on *gyrA* at month 7. MGIT culture-based 2nd line phenotypic DST results are shown for tested drugs as R (resistant) or S (susceptible). Shaded blocks indicate poor adherence to treatment. Bolded months indicate the sequenced isolates and bolded mutations indicate emerging mutations identified in this study. AMI: Amikacin. BDQ: Bedaquiline. CAP: Capreomycin. CFZ: Clofazimine. DLM: Delamanid. ETH: Ethionamide. EMB: Ethambutol. IMI: Imipenem. INH H: Isoniazid high dose. KANA: Kanamycin. LEVO: Levofloxacin. LZD: Linezolid. Mg: milligrams. MIC: minimum inhibitory concentration. MOXI H: Moxifloxacin high dose. MOXI L: Moxifloxacin low dose. PAS: *p*-aminosalicylic acid. Pre-XDR-TB: Pre-extensively drug-resistant tuberculosis. PZA: Pyrazinamide. R: Resistant. RIF: Rifampicin. S: Susceptible. SSR: Standard Short regimen. TERI: Terizidone.

**BDQ 200mg**

**rv0678 (D165fs, 10.14%)**

Extended

Treatment completed

**LEVO 1600mg**

S

**gyrA (D94N, 32.35%), (D94G, 62.16%)**

R

Stopped

gyrA (D94G, 100%)

**CFZ 100mg**

rv1979c (R409Q)

R

**ETH 1000mg**

ethA (A381P)

R

Stopped

R

**PZA 2000mg**

pncA (E173fs)

**INH H 900mg**

katG (S315T)

R

**EMB 1600mg**

embB (M306I)

**KANA 750mg**

S

S

**MOXI L 400mg**

S

R

R

**MOXI H 800mg**

S

S

**LZD 600mg**

S

S

**TERI 750mg**

Out of stock

**CAP 100mg**

S

**PAS 8000mg**

S

IMI

RIF

rpoB (D435V)

R

AMI

S

DLM

S

Culture status

+

+

+

+

+

+

+

-

-

-

-

-

Sputum smear

+++

+

+

+++

+++

+++

-

-

-

-

-

-

Chest Xray

Bilateral infiltrates

Left lung cavities

Minimal cavities and infiltrates

Normal

6 months

pre-

baseline

Baseline

Enrolment

**Month 1**

Month 2

**Month 4**

Month 5

Month 6

**Month 7**

Month 10

Month 12

Month 14

Month 18

Month 26

SSR

BDQ regimen

Emerging resistance

: Poor adherence to treatment

rv0678 (D165fs, 84.62%). MIC = 4mg/L

**Drug**

Scanty infiltration

Completed

treatment

Left lung infiltrates

Treatment failure (Pre-

XDR-TB)

**GENOTYPIC PROFILES**

**Patient Profiles**

**Patient 1**

This patient’s *Mtb* strain had one mutation on *rpoB* (Q436del) associated with RIF resistance at 100% frequency throughout while MTBDR*plus* detected the S450L mutation on *rpoB*.

**Patient 2**

This patient displayed only one mutation associated with RIF resistance – H445N on *rpoB* at 100% frequency consistently throughout treatment.

**Patient 3**

This patient had six fixed mutations (93.3-100% frequencies) consistently throughout treatment and one emerging variant at month 8. Resistance to RIF was conferred by the *rpoB* S450L mutation at 93.3-100% frequencies during treatment and INH resistance were conferred by the *katG* S315T mutation at 100% frequency throughout. EMB resistance was conferred by four mutations in two genes involved in EMB resistant genes: *embB* G406A (100% frequency throughout) and three *embA* variants (74C>T, -12C>T, -3293C>T) (96.55-100% frequency during treatment). FQ resistance emerged on *gyrA* as an A90V variant at 22% frequency at month 8. Routine WGS conducted at baseline for this patient detected the following four mutations: *katG* (S315T), *embB* (G406A), *rpoB* (S450T), and *pncA* (D126E), all at 100% frequency. The latter two of which our deep sequencing data analysed by CLC Genomics workbench did not detect.

**Patient 4**

In total, four mutations were detected in samples from this patient. The baseline isolate of this patient did not yield results on CLC due to the low depth of coverage obtained. This patient’s month 2 and 4 isolates revealed 4 mutations at 100% frequency conferring resistance to RIF (*rpoB* S450L), INH and ETH (*inhA* I21T), EMB (*embB* Q497R) and STR (*rpsL* K88R). Routine WGS conducted at baseline for this patient detected the following six mutations all at 100% frequency: *inhA* promoter c-15t, *rpoB* S450L, *embB* Q497R, *rpsL* K88R, *pncA* A102V, *gyrA* L105R.

**Patient 5**

Three variants emerged at month 4 and six mutations were fixed and detected across all baseline, month 4 and month 7 isolates: *rpoB* (D435V at 100%) involved in RIF resistance, *katG* (S315T at 100%) involved in INH resistance, *ethA* (A381P at 97.92-100%) involved in ETH resistance, *embB* (M306I at 100%) involved in EMB resistance, *pncA* (E173fs at 93.62-98.07%) involved in PZA resistance and *rv1979c* (R409Q at 98.86-100%) involved in CFZ resistance. At month 4, two *gyrA* mutations involved in FQ resistance emerged: a D94G at 62.16% frequency and D94N mutation at 32.35%. By month 7, only the D94G mutation was present at 100% frequency. At month 4, a D165 frameshift variant on *rv0678* emerged at 10.14% which increased to 84.62% frequency at month 7.

**Lineages**

Two patients were infected with the East-Asian (Beijing) strains (Lineage 2), while the three remaining patients were infected with Euro-American strains (Lineage 4). The sequencing results from patient 4’s baseline isolate was inconclusive due to the low percentage of reads mapped (5.06%) and poor depth of coverage (7.01x). Table S1 shows the lineage, family, spoligotype, DR-TB profile, number of reads, percentage of reads mapped and the median depth of coverage for the 23 sequenced longitudinal samples from the five DR-TB patients. The average median depth of coverage of all samples (excluding patient 4’s baseline isolate which was an outlier) was 159x. The SNP tree shows the sequences of five patients’ longitudinal isolates aligning near/close to each other showing relatedness. Patient 4’s baseline sequence, deviated slightly due to the low depth of coverage and percentage of reads mapped.

**Supplementary table 1.** Lineage, family, spoligotype, DR-TB profile, number of reads, percentage of reads mapped and median depth of coverage (x) for the 23 sequenced samples and H37Rv control.

| Patient | Months | Lineage | Family | Spoligotype | DR-TB profile | Reads (N) | Reads (%) | Depth (x) |
| --- | --- | --- | --- | --- | --- | --- | --- | --- |
| 1 | Baseline | 4.1.1.1 | Euro-American | X2, RD183 | Pre-MDR | 5775452 | 97.98 | 133 |
| 6 | 4.1.1.1 | Euro-American | X2, RD183 | Pre-MDR | 5123808 | 97.32 | 153 |
| 7 | 4.1.1.1 | Euro-American | X2, RD183 | Pre-MDR | 7421449 | 98.09 | 201 |
| 8 | 4.1.1.1 | Euro-American | X2, RD183 | Pre-MDR | 6479271 | 98.48 | 295 |
| 12 | 4.1.1.1 | Euro-American | X2, RD183 | Pre-MDR | 5332156 | 98.21 | 149 |
| 2 | Baseline | 2.2.1 | East-Asian | Beijing; RD105;RD207;RD181 | Pre-MDR | 5081902 | 96.6 | 100 |
| 1 | 2.2.1 | East-Asian | Beijing; RD105;RD207;RD181 | Pre-MDR | 3963144 | 97.83 | 106 |
| 2 | 2.2.1 | East-Asian | Beijing; RD105;RD207;RD181 | Pre-MDR | 5033181 | 97.41 | 132 |
| 3 | 2.2.1 | East-Asian | Beijing; RD105;RD207;RD181 | Pre-MDR | 6892832 | 97.47 | 159 |
| 6 | 2.2.1 | East-Asian | Beijing; RD105;RD207;RD181 | Pre-MDR | 5721911 | 97.63 | 128 |
| 3 | Baseline | 4.3.3 | Euro-American | LAM;T; RD115 | MDR | 3824566 | 98.51 | 109 |
| 1 | 4.3.3 | Euro-American | LAM;T; RD115 | MDR | 6212116 | 98.68 | 179 |
| 2 | 4.3.3 | Euro-American | LAM;T; RD115 | MDR | 5894096 | 98.25 | 164 |
| 3 | 4.3.3 | Euro-American | LAM;T; RD115 | MDR | 6247655 | 98.3 | 172 |
| 6 | 4.3.3 | Euro-American | LAM;T; RD115 | MDR | 4621706 | 98 | 124 |
| 7 | 4.3.3 | Euro-American | LAM;T; RD115 | MDR | 6356933 | 97.15 | 169 |
| 8 | 4.3.3 | Euro-American | LAM;T; RD115 | Pre-XDR | 4938212 | 94.79 | 134 |
| 4 | Baseline | 4.4.1.1 | Euro-American | LAM;T;S;X;H | Pre-XDR | 325173 | 5.06 | 7.01 |
| 2 | 4.4.1.1 | Euro-American | LAM;T;S;X;H | MDR | 5592019 | 98.06 | 150 |
| 4 | 4.4.1.1 | Euro-American | LAM;T;S;X;H | MDR | 6103813 | 98.14 | 168 |
| 5 | Baseline | 2.2.2 | East-Asian | Beijing; RD105;RD207 | MDR | 6941104 | 97.07 | 175 |
| 4 | 2.2.2 | East-Asian | Beijing; RD105;RD207 | MDR | 7623082 | 97.99 | 193 |
| 7 | 2.2.2 | East-Asian | Beijing; RD105;RD207 | Pre-XDR | 6912509 | 98.07 | 154 |
| H37Rv control | | 4.9 | Euro-American | T1 | Sensitive | 7656112 | 98.3 | 210 |

DR-TB: Drug-resistant tuberculosis. MDR-TB: Multi-drug resistant tuberculosis. XDR-TB: Extensively drug-resistant tuberculosis.


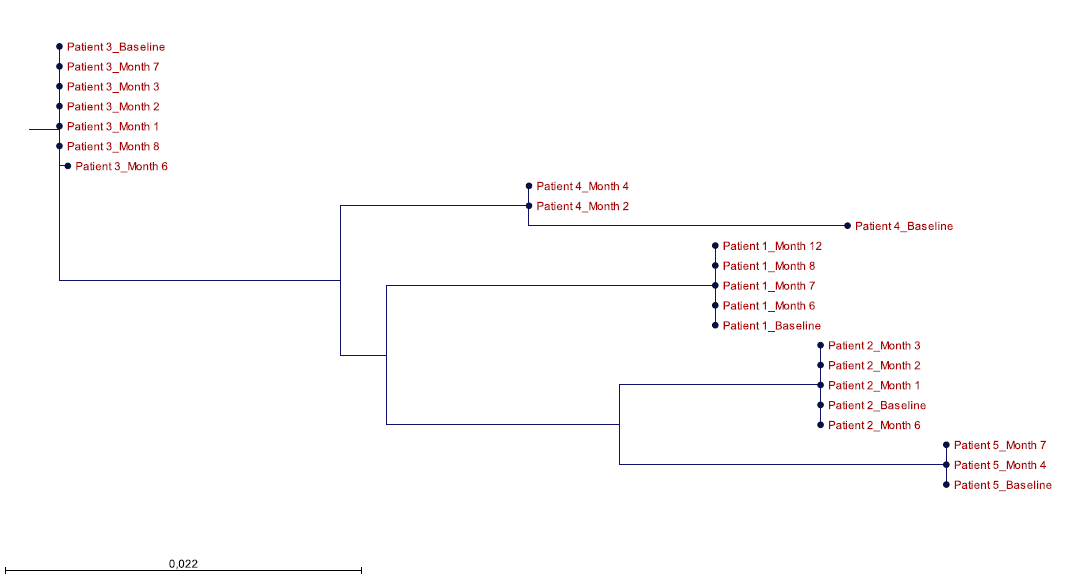


**Supplementary figure 3**. Evolutionary tree

**Discordant results**

Conflicting results were obtained amongst three patient cases, two involving the MTBDR*plus* assay. The conflicting *rpoB* mutations reported on MTBDR*plus* (H445D) and detected by WGS (D435V) may be explained by an error in either of the tests for patient 5. It should be noted that LPA, as part of the parent study, was performed directly on the sputum sample, while sequencing was performed on the sub-cultured isolate. This may have introduced differences in the mutations present since Nimmo *et al.* recently demonstrated decreased genetic diversity amongst TB isolates from culture compared to paired direct sputum samples.3 Furthermore, genetic diversity in single colonies is known to vary from their parent isolates.4 Several sub-culturing passages demonstrated a significant loss of minor-variant resistant subpopulations across resistance-determining regions and micro-heteroresistant subpopulations were seen to decline significantly over multiple sub-culture passages.5–7 It was recently found that particular *Mtb* strains can also be favoured over others in culture and different colony morphologies can occur reducing its specificity.3 Another conflict was that of patient 2 in whom RIF-mono-resistance was detected on both MTBDR*plus* and sequencing (*rpoB* H445N) yet was phenotypically RIF susceptible (MIC <0.25 mg/L). The discordance between the susceptible phenotype and resistant genotype may be explained by the cultured isolates losing some of their acquired resistances over long storage and sub-culturing steps.6 Another reason could be that the H445N mutation confers low-level RIF resistance, as was previously reported by Miotto *et al*.8 Other studies attributed discordances due to heteroresistance, however we did not find evidence of heteroresistance for this patient.9,10

MTBDR*plus* also reported high-level INH resistance on *katG* (S315T) and RIF resistance on *rpoB* (S450L) in patient 1 who was classified as an MDR-TB patient. However, the patient’s isolates were phenotypically susceptibility to INH (MIC <0.12 mg/L), and sequencing identified no mutations in the *katG* gene by both TB Profiler and the CLC Genomics workbench. The discordance could be explained by both the wild-type and mutant probes binding on the MTBDR*plus* resulting in a false positive for the *katG* mutation. It should be noted that this patient had a few non-consecutive positive cultures and non-tuberculous mycobacteria detected towards the end of treatment, which (if present at baseline) may have confounded the MTBDR*plus* result.11 A study investigated several discordant mutations for RIF and INH resistance between the MTBDR*plus* assay and sequencing, and concluded that low confidence mutations contribute to the discordance between the MTBDR*plus* assay and phenotypic susceptibility.12 Another study found that no resistance was detected by the MTBDR*sl* assay in phenotypically resistant pre- and XDR-TB isolates.13 Pankhurst *et al*. explained that discordance could be due to mixed infection, contaminated samples or poor quality sequencing.14 The latter are likely reasons because the Hain MTBDR assays were found by WHO to have good diagnostic performances, sensitivities and specificities.15

**References**

**1** Van Soolingen D, Hermans,’ PWM, De Haas,’ PEW *et al.* Occurrence and Stability of Insertion Sequences in Mycobacterium tuberculosis Complex Strains: Evaluation of an Insertion Sequence-Dependent DNA Polymorphism as a Tool in the Epidemiology of Tuberculosis. *J Clin Microbiol* 1991; **29**: 2578–86.

**2** Lieberman TD, Wilson D, Misra R *et al.* Genomic diversity in autopsy samples reveals within-host dissemination of HIV-associated M. tuberculosis. *Nat Med* 2016; **22**: 1470–4.

**3** Nimmo C, Shaw LP, Doyle R *et al.* Whole genome sequencing Mycobacterium tuberculosis directly from sputum identifies more genetic diversity than sequencing from culture. *BMC Genomics* 2019; **20**: 1–9.

**4** Black PA, de Vos M, Louw GE *et al.* Whole genome sequencing reveals genomic heterogeneity and antibiotic purification in Mycobacterium tuberculosis isolates. *BMC Genomics* 2015; **16**.

**5** Doyle RM, Burgess C, Williams R *et al.* Direct whole-genome sequencing of sputum accurately identifies drug-resistant mycobacterium tuberculosis faster than MGIT culture sequencing. *J Clin Microbiol* 2018; **56**.

**6** Metcalfe JZ, Streicher E, Theron G *et al.* Mycobacterium tuberculosis subculture results in loss of potentially clinically relevant heteroresistance. *Antimicrob Agents Chemother* 2017; **61**.

**7** Shockey AC, Dabney J, Pepperell CS. Effects of host, sample, and in vitro culture on genomic diversity of pathogenic mycobacteria. *Front Genet* 2019; **10**.

**8** Miotto P, Cabibbe AM, Borroni E *et al.* Role of disputed mutations in the rpoB gene in interpretation of automated liquid MGIT culture results for rifampin susceptibility testing of mycobacterium tuberculosis. *J Clin Microbiol* 2018; **56**.

**9** Dheda K, Gumbo T, Maartens G *et al.* The epidemiology, pathogenesis, transmission, diagnosis, and management of multidrug-resistant, extensively drug-resistant, and incurable tuberculosis. *Lancet Respir Med Comm* 2017; **5**: 291–360.

**10** Rinder H, Mieskes KT, Löscher T. Heteroresistance in Mycobacterium tuberculosis. *Int J Tuberc Lung Dis* 2001; **5**: 339–45.

**11** Maiga M, Siddiqui S, Diallo S *et al.* Failure to recognize nontuberculous mycobacteria leads to misdiagnosis of chronic pulmonary tuberculosis. *PLoS One* 2012; **7**.

**12** Solari L, Santos-Lazaro D, Puyen ZM. Mutations in Mycobacterium tuberculosis Isolates with Discordant Results for Drug-Susceptibility Testing in Peru. *Int J Microbiol* 2020.

**13** Javed H, Bakuła Z, Pleń M *et al.* Evaluation of Genotype MTBDRplus and MTBDRsl Assays for Rapid Detection of Drug Resistance in Extensively Drug-Resistant Mycobacterium tuberculosis Isolates in Pakistan. *Front Microbiol* 2018; **9**: 2265.

**14** Pankhurst LJ, del Ojo Elias C, Votintseva AA *et al.* Rapid, comprehensive, and affordable mycobacterial diagnosis with whole-genome sequencing: A prospective study. *Lancet Respir Med* 2016; **4**: 49–58.

**15** WHO. *Consolidated Guidelines on Tuberculosis. Module 3 : Diagnosis - Rapid diagnostics for tuberculosis detection*. 2021. https://www.who.int/publications/i/item/9789240029415.
